# Supplementary material for: Excess mortality associated with high ozone exposure: A national cohort study in China
Source: PubMed Central journal article supplement — Environ Sci Ecotechnol. 2023 Jan 21;15:100241. doi: 10.1016/j.ese.2023.100241 (PMC9905662; doi:10.1016/j.ese.2023.100241), 2023-01-21
Supplement: mmc1.pdf [file mmc1.pdf]

## Supplementary Materials

### Excess mortality associated with high ozone exposure: A national cohort study in China

Yang Yuan<sup>a,1</sup>, Kai Wang<sup>a,1</sup>, Haitong Zhe Sun<sup>b,c</sup>, Yu Zhan<sup>d</sup>, Zhiming Yang<sup>e</sup>, Kejia Hu<sup>f</sup>, Yunquan Zhang<sup>a,\*</sup>

- <sup>a</sup> Institute of Social Development and Health Management, Hubei Province Key Laboratory of Occupational Hazard Identification and Control, School of Public Health, Wuhan University of Science and Technology, Wuhan 430065, China
- <sup>b</sup> Centre for Atmospheric Science, Yusuf Hamied Department of Chemistry, University of Cambridge, Cambridge, CB2 1EW, UK
- <sup>c</sup> Department of Earth Sciences, University of Cambridge, Cambridge, CB2 3EQ, UK
- <sup>d</sup> Department of Environmental Science and Engineering, Sichuan University, Chengdu, Sichuan 610065, China
- <sup>e</sup> School of Economics and Management, University of Science and Technology Beijing, Beijing 100083, China
- <sup>f</sup> Department of Big Data in Health Science, School of Public Health, Zhejiang University, Hangzhou, 310058, China
- <sup>1</sup> Yang Yuan and Kai Wang were co-first authors who contributed equally to this work.

\* Corresponding author. Institute of Social Development and Health Management, Hubei Province Key Laboratory of Occupational Hazard Identification and Control, School of Public Health, Wuhan University of Science and Technology, Wuhan 430065, China. Email: [YunquanZhang@wust.edu.cn](mailto:YunquanZhang@wust.edu.cn).

## Table of contents

**Table S1.** Estimates of HRs using converted metrics of O<sub>3</sub> concentrations.

**Table S2.** Descriptive characteristics of air pollutants at participants' residential cities during 2011–2018 and spearman's rank correlation coefficients among the air pollutants.

**Table S3.** Sensitivity analysis for the association between long-term ozone exposure and all-cause mortality.

**Figure S1.** Flowchart of participant inclusion and exclusion.

**Figure S2.** Distributions of survey cities and O<sub>3</sub> concentrations across China.

**Figure S3.** The directed acyclic graph for the association between long-term O<sub>3</sub> exposure and mortality.

**Figure S4.** Annual average warm-season O<sub>3</sub> concentrations in China from 2011 to 2018.

**Table S1.** Estimates of HRs using converted metrics of O<sub>3</sub> concentrations

| O <sub>3</sub> metrics | HR (95% CI)                |
|------------------------|----------------------------|
| <b>6mDMA8</b>          | <b>1.179 (1.132–1.229)</b> |
| ADA24                  | 1.090 (1.067–1.113)        |
| ADMA8                  | 1.153 (1.113–1.195)        |
| ADMA1                  | 1.189 (1.139–1.241)        |
| 6mDA24                 | 1.104 (1.078–1.132)        |
| 6mDMA1                 | 1.219 (1.161–1.281)        |

Notes: We used 6-month warm-season mean of daily maximum 8-h average (6mDMA8) as the ozone metric in our analyses and considered five metrics for conversion as (1) 6-month warm-season mean of 24-h daily average (6mDA24), (2) annual mean of daily maximum 8-h average (ADMA8), (3) annual mean of 24-h daily average (ADA24), (4) annual mean of daily maximum 1-h average (ADMA1), and (5) 6-month warm-season mean of daily maximum 1-h average (6mDMA1).

**Table S2.** Descriptive characteristics of air pollutants at participants' residential cities during 2011–2018 and spearman's rank correlation coefficients among the air pollutants.

| Pollutants                            | Mean (SD)    | Min. | Quartile        |                 |                 | Max.  | Correlation coefficients |                   |                 |
|---------------------------------------|--------------|------|-----------------|-----------------|-----------------|-------|--------------------------|-------------------|-----------------|
|                                       |              |      | P <sub>25</sub> | P <sub>50</sub> | P <sub>75</sub> |       | O <sub>3</sub>           | PM <sub>2.5</sub> | NO <sub>2</sub> |
| O <sub>3</sub> , µg/m <sup>3</sup>    | 100.7 (14.8) | 60.7 | 89.7            | 100.5           | 110.5           | 142.4 | 1                        |                   |                 |
| PM <sub>2.5</sub> , µg/m <sup>3</sup> | 52.0 (18.1)  | 16.1 | 38.1            | 49.7            | 64.1            | 102.4 | 0.57                     | 1                 |                 |
| NO <sub>2</sub> , µg/m <sup>3</sup>   | 25.3 (11.3)  | 11.3 | 16.4            | 22.4            | 31.9            | 72.9  | 0.62                     | 0.8               | 1               |

Abbreviation: SD, standard deviation; NO<sub>2</sub>, nitrogen dioxide; PM<sub>2.5</sub>, fine particulate matter; O<sub>3</sub>, ozone.

**Table S3.** Sensitivity analysis for the association between long-term ozone exposure and all-cause mortality.

|                                                     | Per 10 ug/m <sup>3</sup> Increase |             | P-value |
|-----------------------------------------------------|-----------------------------------|-------------|---------|
|                                                     | HR                                | 95% CI      |         |
| <b>Single-pollutant</b>                             |                                   |             |         |
| Main analysis                                       | 1.179                             | 1.132–1.229 | <0.001  |
| Excluding individuals with survive time <1 year     | 1.182                             | 1.132–1.234 | <0.001  |
| Considering the clustering effect of cities         | 1.247                             | 1.196–1.300 | <0.001  |
| Adjusting for province-level GDP                    | 1.217                             | 1.165–1.270 | <0.001  |
| Adjusting for variables based on DAG                | 1.181                             | 1.134–1.230 | <0.001  |
| Using 1-year lag O <sub>3</sub> exposure            | 1.088                             | 1.065–1.111 | <0.001  |
| Using 2-year lag O <sub>3</sub> exposure            | 1.025                             | 1.003–1.048 | <0.001  |
| <b>Co-pollutant</b>                                 |                                   |             |         |
| Main analysis adjusting for PM <sub>2.5</sub>       | 1.250                             | 1.191–1.312 | <0.001  |
| Adjusting for NO <sub>2</sub>                       | 1.286                             | 1.222–1.352 | <0.001  |
| Adjusting for PM <sub>2.5</sub> and NO <sub>2</sub> | 1.259                             | 1.200–1.320 | <0.001  |

**Notes:** Main analysis was stratified by gender and age, adjusted for demographic characteristics: educational level, married status, residence and region; behavioral factors: alcohol consumption, smoking status and social activity; health status: BMI, hypertension, diabetes, disability; and annual average temperature. Abbreviation: GDP, Gross Domestic Product; DAG, directed acyclic graph.

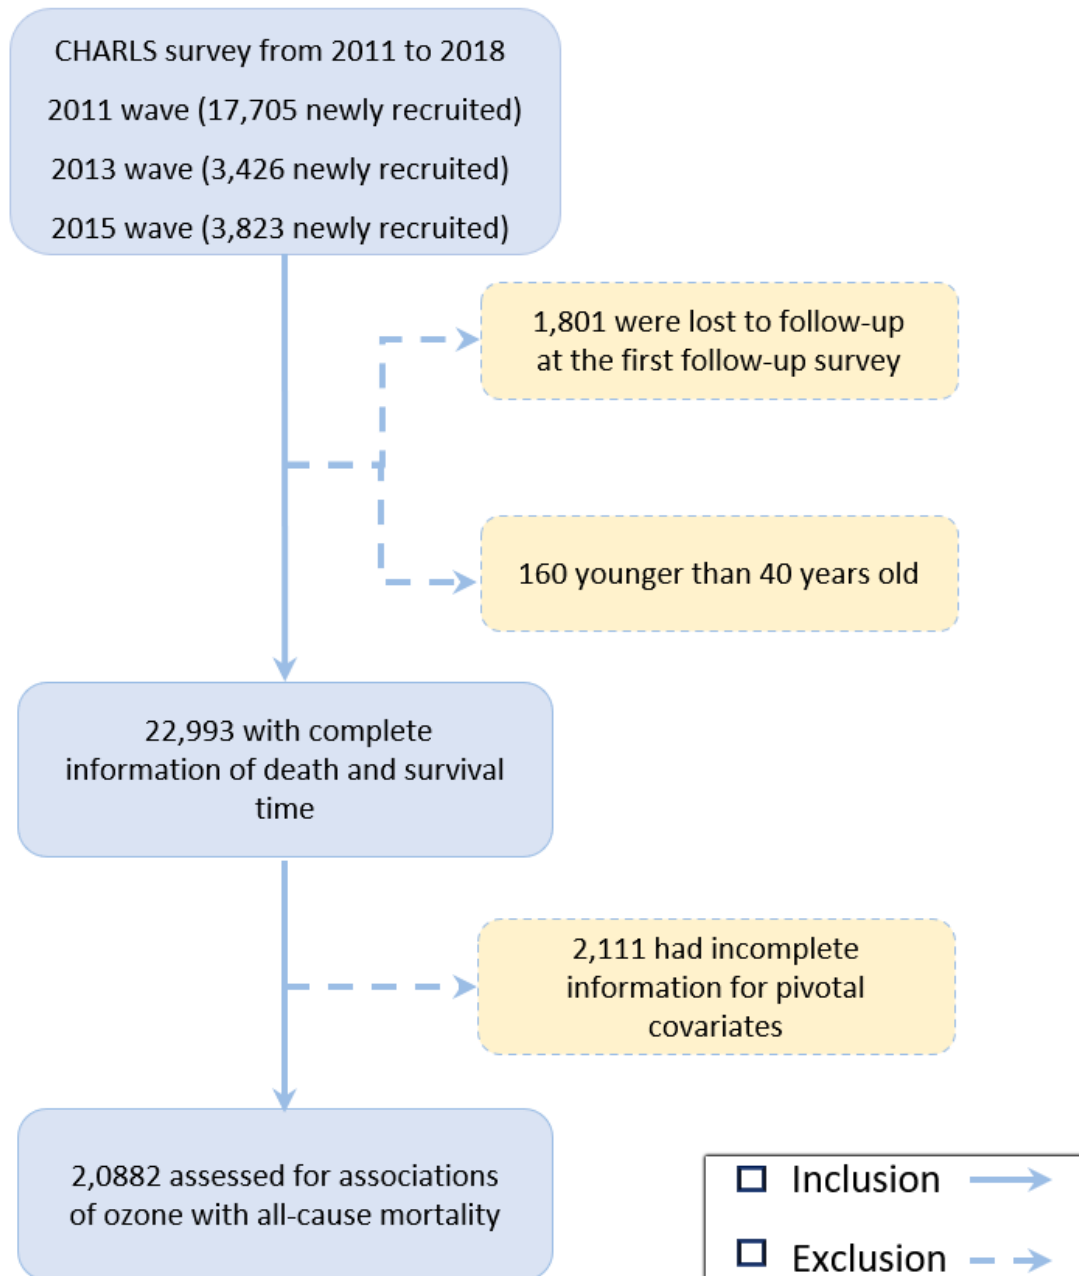

**Figure S1.** Flowchart of participant inclusion and exclusion.

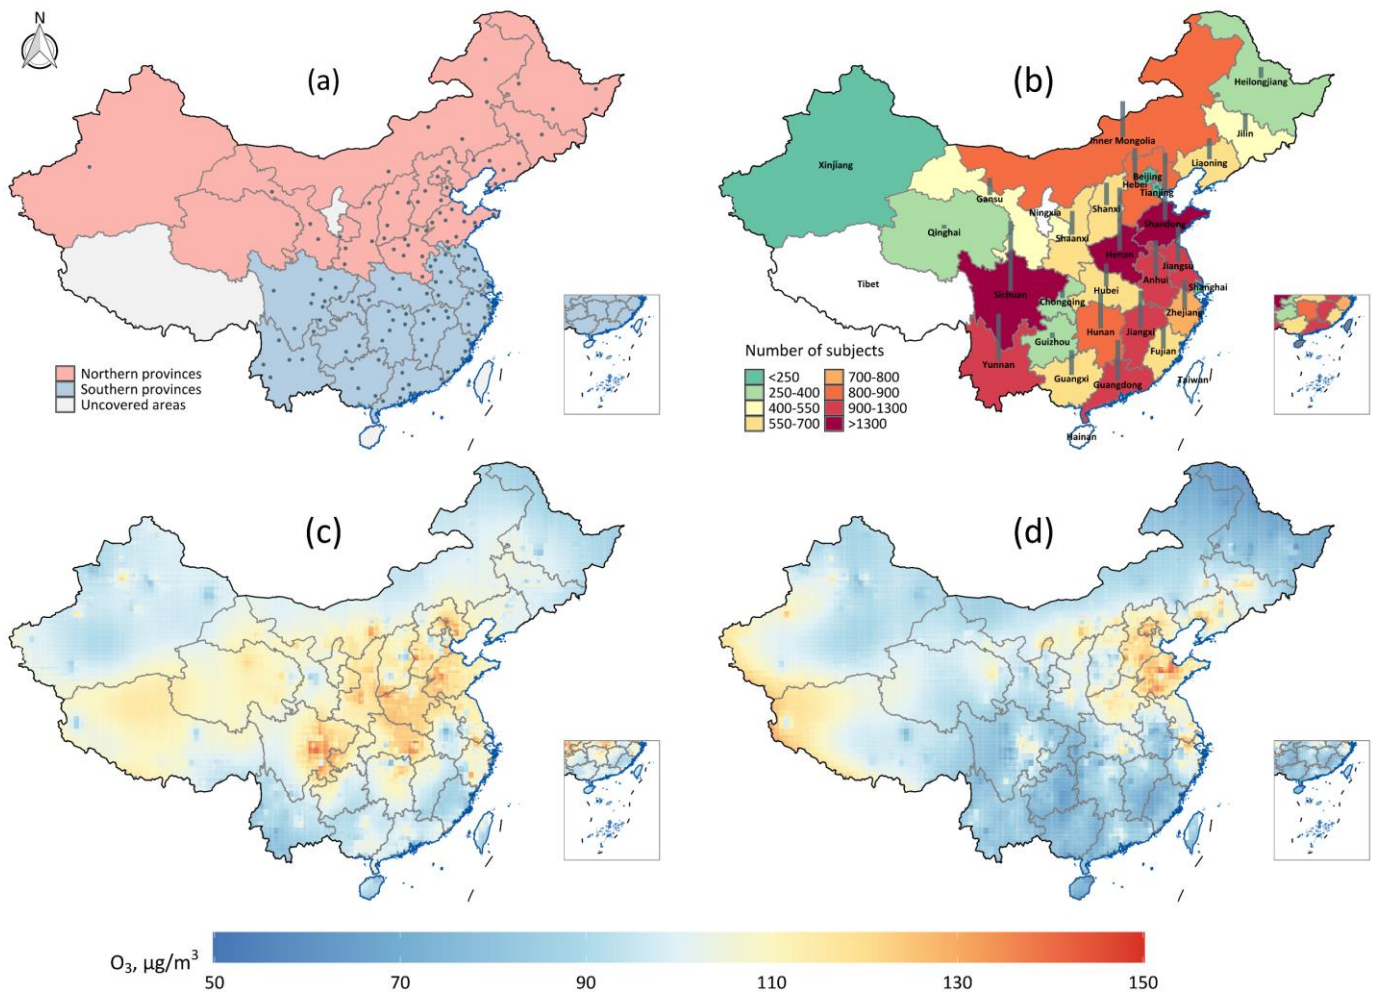

**Figure S2. Distributions of survey cities and O<sub>3</sub> concentrations across China.** (a) Geographical locations of 125 survey cities; (b) the number of participants by province; (c) annual warm-season O<sub>3</sub> concentration in 2011; (d) annual warm-season O<sub>3</sub> concentration in 2018.

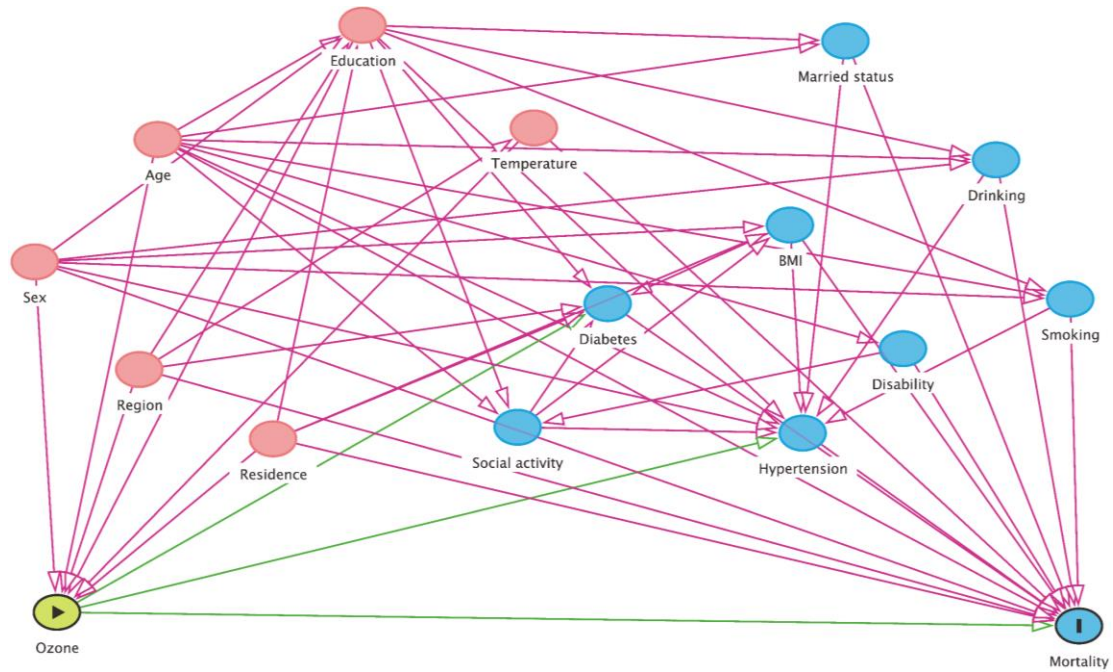

**Figure S3.** The directed acyclic graph for the association between long-term O<sub>3</sub> exposure and mortality. DAG was created by using the online DAGitty tool (<http://www.dagitty.net/>, accessed on October 21th, 2022), and used to identify a minimal adjustment set of variables. In this study, the minimal set included sex, age, education, temperature, residence and region.



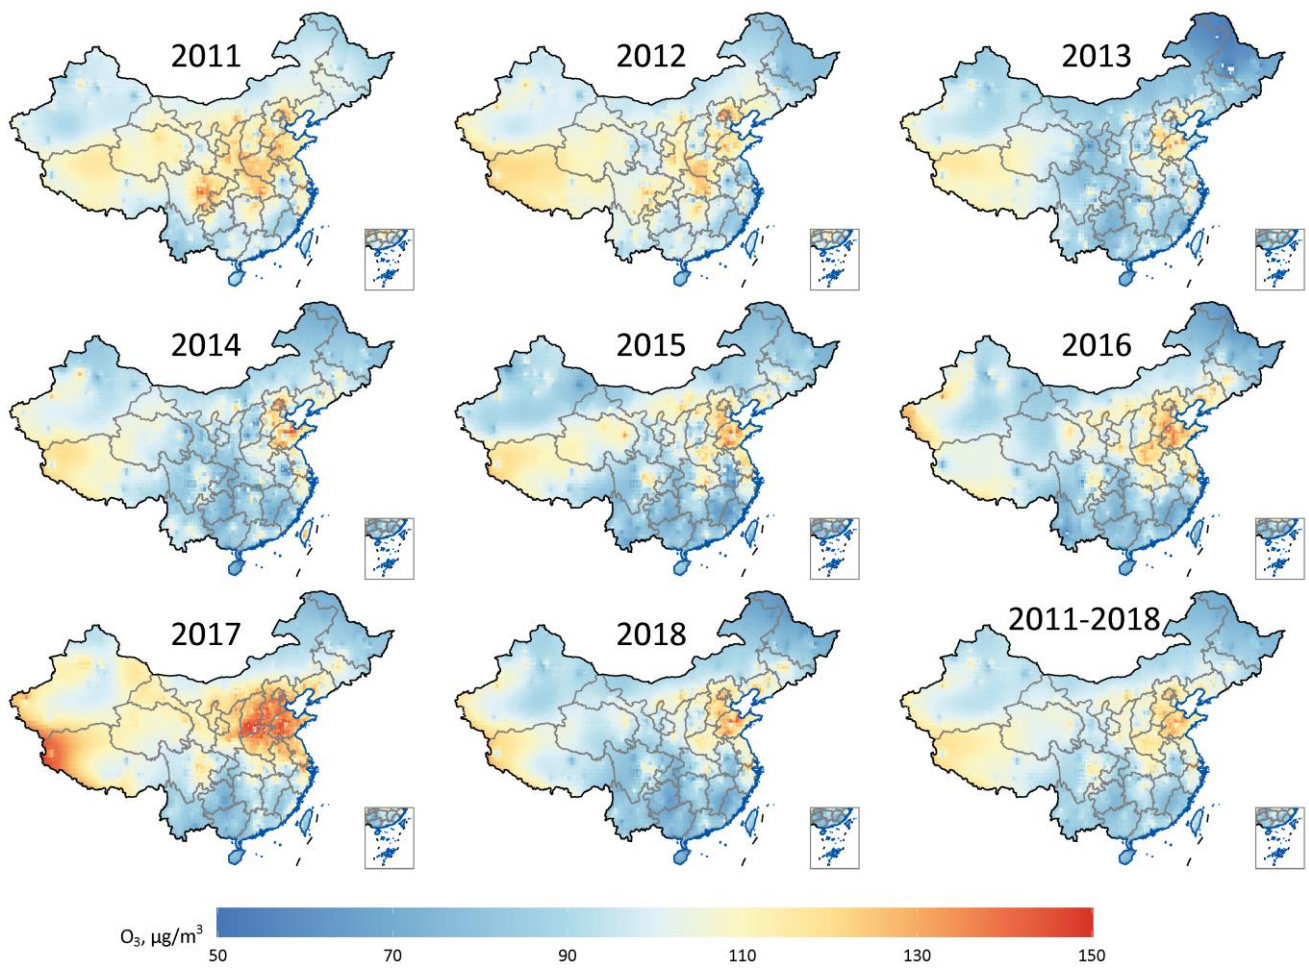

**Figure S4.** Annual average warm-season O<sub>3</sub> concentrations in China from 2011 to 2018.
